# Supplementary material for: Regulation of the Peptidoglycan Polymerase Activity of PBP1b by Antagonist Actions of the Core Divisome Proteins FtsBLQ and FtsN
Source: PubMed Central journal article supplement (PMC6325244; doi:10.1128/mbio.01912-18), 2019-01-08
Supplement: mBio.01912-18-sf001.pdf [file mBio.01912-18-sf001.pdf]

**Figure S1**

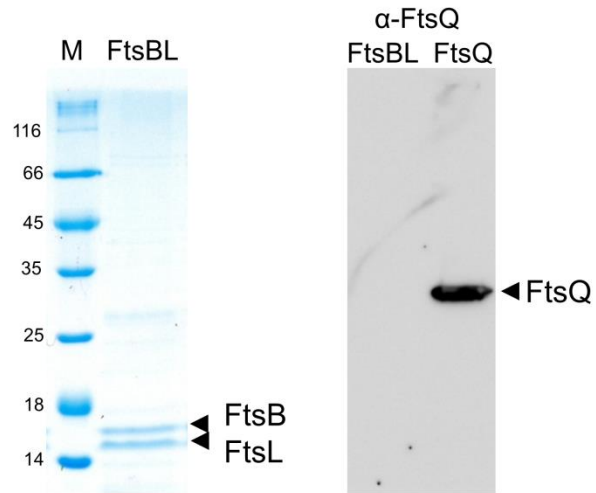

**Figure S1.** Purification of FtsBL and immunoblotting using antibodies against FtsQ. Left, Coomassie blue stained SDS-PAGE showing FtsB and FtsL bands indicated by arrows, M, molecular standards. Right ( $\alpha$ -FtsQ), immunoblotting results confirming the absence of FtsQ in the purified FtsBL sample and FtsQ as control.
