# Supplementary material for: Regulation of the Peptidoglycan Polymerase Activity of PBP1b by Antagonist Actions of the Core Divisome Proteins FtsBLQ and FtsN
Source: PubMed Central journal article supplement (PMC6325244; doi:10.1128/mbio.01912-18), 2019-01-08
Supplement: mBio.01912-18-sf003.pdf [file mBio.01912-18-sf003.pdf]

**Figure S3**

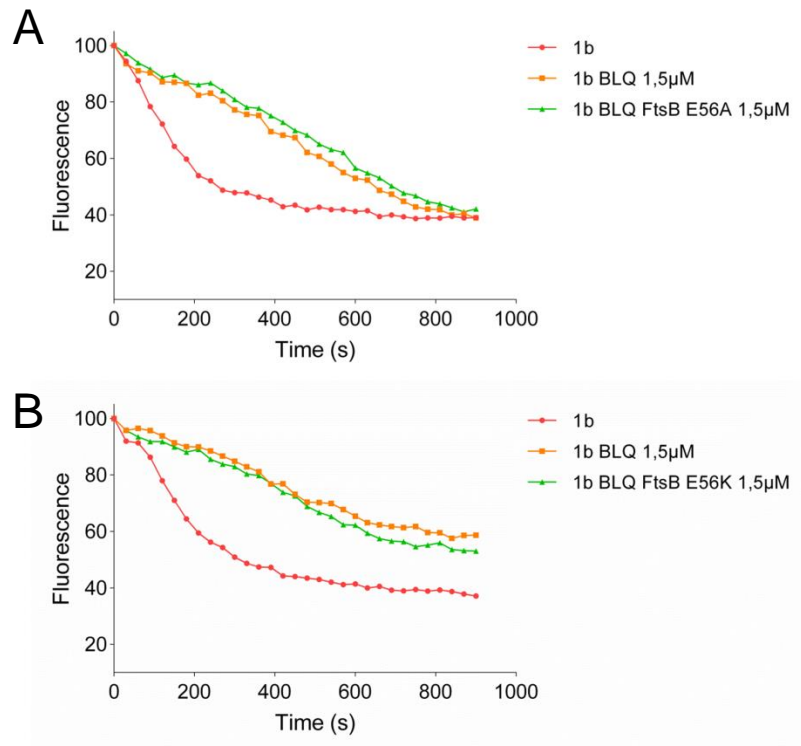

**Figure S3.** Effect of FtsBLQ containing FtsB mutations E56A (A) or E56K (B) on the GTase activity of PBP1b measured by continuous fluorescence assay.
