# Supplementary material for: Regulation of the Peptidoglycan Polymerase Activity of PBP1b by Antagonist Actions of the Core Divisome Proteins FtsBLQ and FtsN
Source: PubMed Central journal article supplement (PMC6325244; doi:10.1128/mbio.01912-18), 2019-01-08
Supplement: mBio.01912-18-sf005.pdf [file mBio.01912-18-sf005.pdf]

**Figure S5**

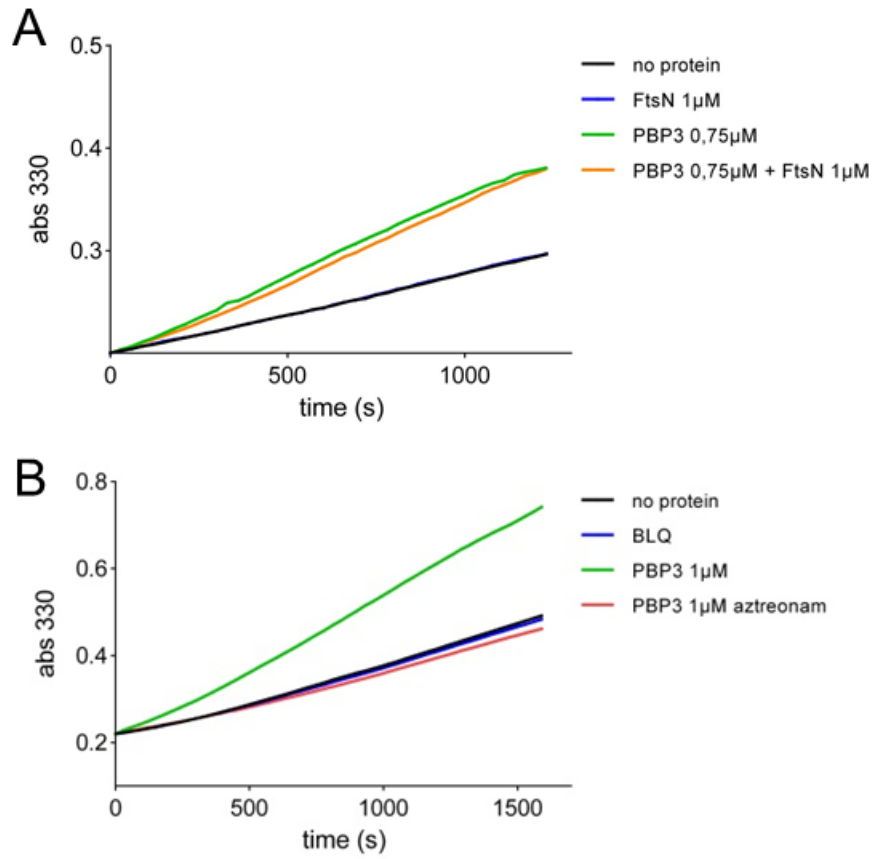

**Figure S5.** Effect of aztreonam and FtsN on the hydrolysis of S2d by PBP3
